# Supplementary material
Source: ML conference proceedings conference paper supplement (https://proceedings.neurips.cc/paper_files/paper/2019/hash/bb1443cc31d7396bf73e7858cea114e1-Abstract.html)
Supplement: Supplementary file [file bb1443cc31d7396bf73e7858cea114e1-Supplemental.zip]

# Supplementary Material

## A Proofs

### A.1 Solution to Anderson Acceleration

*Proof.* Let  $\mu$  be the dual variable of the equality constraint of (10). Both  $\alpha^k$  and  $\mu^k$  should satisfy the Karush-Kuhn-Tucker (KKT) system

$$\begin{bmatrix} 2\Delta_k^T \Delta_k & \mathbf{1} \\ \mathbf{1}^T & 0 \end{bmatrix} \begin{bmatrix} \alpha^k \\ \mu^k \end{bmatrix} = \begin{bmatrix} \mathbf{0} \\ 1 \end{bmatrix}. \quad (20)$$

This block matrix can be inverted explicitly, with

$$\begin{bmatrix} 2\Delta_k^T \Delta_k & \mathbf{1} \\ \mathbf{1}^T & 0 \end{bmatrix}^{-1} = \frac{1}{\mathbf{1}^T (\Delta_k^T \Delta_k)^{-1} \mathbf{1}} \begin{bmatrix} \frac{1}{2} (\Delta_k^T \Delta_k)^{-1} Y_k & (\Delta_k^T \Delta_k)^{-1} \mathbf{1} \\ \mathbf{1}^T (\Delta_k^T \Delta_k)^{-1} & -2 \end{bmatrix}, \quad (21)$$

where  $Y_k = \mathbf{1}^T (\Delta_k^T \Delta_k)^{-1} \mathbf{1} I - \mathbf{1} I^T (\Delta_k^T \Delta_k)^{-1}$ . Using this inverse we easily solve the linear system, which gives the result in (7).  $\square$

### A.2 Proof to Proposition 1

*Proof.* We begin by the bound on  $\tilde{\alpha}^k$ . Indeed, with (14),

$$\|\tilde{\alpha}^k\|^2 = \frac{\mathbf{1}^T (\tilde{\Delta}_k^T \tilde{\Delta}_k + \lambda I)^{-2} \mathbf{1}}{(\mathbf{1}^T (\tilde{\Delta}_k^T \tilde{\Delta}_k + \lambda I)^{-1} \mathbf{1})^2} \quad (22)$$

$$\leq \frac{1}{m} \max_{\|v\|=1} \frac{v^T (\tilde{\Delta}_k^T \tilde{\Delta}_k + \lambda I)^{-2} v}{(v^T (\tilde{\Delta}_k^T \tilde{\Delta}_k + \lambda I)^{-1} v)^2} \quad (23)$$

$$= \frac{1}{m} \max_{\|v\|=1} \frac{\|(\tilde{\Delta}_k^T \tilde{\Delta}_k + \lambda I)^{-\frac{1}{2}} (\tilde{\Delta}_k^T \tilde{\Delta}_k + \lambda I)^{-\frac{1}{2}} v\|^2}{\|(\tilde{\Delta}_k^T \tilde{\Delta}_k + \lambda I)^{-\frac{1}{2}} v\|^4} \quad (24)$$

$$\leq \frac{1}{m} \|(\tilde{\Delta}_k^T \tilde{\Delta}_k + \lambda I)^{-\frac{1}{2}}\|^2 \max_{\|v\|=1} \frac{1}{\|(\tilde{\Delta}_k^T \tilde{\Delta}_k + \lambda I)^{-\frac{1}{2}} v\|^2} \quad (25)$$

$$= \frac{1}{m} \|(\tilde{\Delta}_k^T \tilde{\Delta}_k + \lambda I)^{-\frac{1}{2}}\|^2 \|(\tilde{\Delta}_k^T \tilde{\Delta}_k + \lambda I)^{\frac{1}{2}}\|^2 \quad (26)$$

$$\leq \frac{\lambda + \|\tilde{\Delta}_k\|^2}{m\lambda}, \quad (27)$$

where the last inequality is because  $\tilde{\Delta}_k^T \tilde{\Delta}_k \geq 0$ , we have  $(\tilde{\Delta}_k^T \tilde{\Delta}_k + \lambda I) \geq \lambda I$ .

We will bound  $\tilde{\alpha}^k - \alpha^k$  from now on. Let  $\tilde{\mu}^k$  be the dual variable of the equality constraint in (13), then  $\tilde{\alpha}^k$  and  $\tilde{\mu}^k$  should satisfy the KKT system

$$\begin{bmatrix} 2(\tilde{\Delta}_k^T \tilde{\Delta}_k + \lambda I) & \mathbf{1} \\ \mathbf{1}^T & 0 \end{bmatrix} \begin{bmatrix} \tilde{\alpha}^k \\ \tilde{\mu}^k \end{bmatrix} = \begin{bmatrix} \mathbf{0} \\ 1 \end{bmatrix}. \quad (28)$$

Expanding the LHS of (28), we obtain

$$\begin{aligned} \begin{bmatrix} 2(\tilde{\Delta}_k^T \tilde{\Delta}_k + \lambda I) & \mathbf{1} \\ \mathbf{1}^T & 0 \end{bmatrix} \begin{bmatrix} \tilde{\alpha}^k \\ \tilde{\mu}^k \end{bmatrix} &= \begin{bmatrix} 2\Delta_k^T \Delta_k & \mathbf{1} \\ \mathbf{1}^T & 0 \end{bmatrix} \begin{bmatrix} \alpha^k \\ \mu^k \end{bmatrix} + \begin{bmatrix} 2\Delta_k^T \Delta_k & \mathbf{1} \\ \mathbf{1}^T & 0 \end{bmatrix} \begin{bmatrix} \tilde{\alpha}^k - \alpha^k \\ \tilde{\mu}^k - \mu^k \end{bmatrix} \\ &+ \begin{bmatrix} 2(\tilde{\Delta}_k^T \tilde{\Delta}_k + \lambda I - \Delta_k^T \Delta_k) & \mathbf{0} \\ \mathbf{0}^T & 0 \end{bmatrix} \begin{bmatrix} \tilde{\alpha}^k \\ \tilde{\mu}^k \end{bmatrix}. \end{aligned} \quad (29)$$

Using the condition (28) and (20), the system becomes

$$\begin{bmatrix} 2(\tilde{\Delta}_k^T \tilde{\Delta}_k + \lambda I) & \mathbf{1} \\ \mathbf{1}^T & 0 \end{bmatrix} \begin{bmatrix} \tilde{\alpha}^k - \alpha^k \\ \tilde{\mu}^k - \mu^k \end{bmatrix} = - \begin{bmatrix} 2(\tilde{\Delta}_k^T \tilde{\Delta}_k + \lambda I - \Delta_k^T \Delta_k) \alpha^k \\ 0 \end{bmatrix}. \quad (30)$$

The explicit solution is obtained by inverting the block matrix, and is written

$$\tilde{\alpha}^k - \alpha^k = - \left( I - \frac{(\tilde{\Delta}_k^T \tilde{\Delta}_k + \lambda I)^{-1} \mathbf{1} \mathbf{1}^T}{\mathbf{1}^T (\tilde{\Delta}_k^T \tilde{\Delta}_k + \lambda I)^{-1} \mathbf{1}} \right) (\tilde{\Delta}_k^T \tilde{\Delta}_k + \lambda I)^{-1} (\tilde{\Delta}_k^T \tilde{\Delta}_k + \lambda I - \Delta_k^T \Delta_k) \alpha^k. \quad (31)$$

Then, we can bound the norm of  $\tilde{\alpha}^k - \alpha^k$  by

$$\|\tilde{\alpha}^k - \alpha^k\| \leq \left\| I - \frac{(\tilde{\Delta}_k^T \tilde{\Delta}_k + \lambda I)^{-1} \mathbf{1} \mathbf{1}^T}{\mathbf{1}^T (\tilde{\Delta}_k^T \tilde{\Delta}_k + \lambda I)^{-1} \mathbf{1}} \right\| \left\| (\tilde{\Delta}_k^T \tilde{\Delta}_k + \lambda I)^{-1} \right\| \left\| (\tilde{\Delta}_k^T \tilde{\Delta}_k + \lambda I - \Delta_k^T \Delta_k) \right\| \|\alpha^k\| \quad (32)$$

$$\leq \left\| (\tilde{\Delta}_k^T \tilde{\Delta}_k + \lambda I)^{-1} \right\| \left\| (\tilde{\Delta}_k^T \tilde{\Delta}_k + \lambda I - \Delta_k^T \Delta_k) \right\| \|\alpha^k\| \quad (33)$$

$$\leq \frac{\|\tilde{\Delta}_k^T \tilde{\Delta}_k - \Delta_k^T \Delta_k\| + \lambda}{\lambda} \|\alpha^k\|, \quad (34)$$

which is the desired result.  $\square$

## B RAA-TD3

---

### Algorithm 2: RAA-TD3 Algorithm

---

Initialize critic networks  $Q_{\theta_1}, Q_{\theta_2}$ , and actor network  $\pi_\phi$  with random parameters  $\theta_1, \theta_2, \phi$ ;

Initialize target networks  $\theta_j^i \leftarrow \theta_j$  ( $i = 1, \dots, m; j = 1, 2$ ),  $\phi' \leftarrow \phi$ ;

Initialize replay buffer  $\mathcal{D}$ ;

Initialize restart checking period  $T_r$  and maximum training steps  $K$ ;

Set  $k = 0, c_1 = 1, \Delta_{min} = \inf, \Delta_{T_r} = 0$ ;

**while**  $k < K$  **do**

    Receive initial observation state  $s_0$ ;

**for**  $t = 1$  **to**  $T$  **do**

        Set  $k = k + 1$ , and  $m_k = \min(c_k, m)$ ;

        Select action  $a_t$  with exploration noise  $a \sim \pi_\phi(s) + \epsilon, \epsilon \sim \mathcal{N}(0, \sigma)$ ;

        Execute  $a_t$ , receive  $r_t$  and  $s_{t+1}$ , store transition  $(s_t, a_t, r_t, s_{t+1})$  into  $\mathcal{D}$ ;

        Sample minibatch of  $N$  transitions  $(s, a, r, s')$  from  $\mathcal{D}$ ;

        Perform Anderson acceleration steps (13)-(14) and obtain  $\tilde{\alpha}^k, \Delta_{T_r} = \Delta_{T_r} + \|\tilde{\delta}_k\|_2^2$ ;

        Update critic networks by minimizing the loss function (18) with (19);

**if**  $t \bmod M = 0$  **then**

            Update actor network by the deterministic policy gradient:

$$\nabla_\phi J(\phi) = N^{-1} \sum \nabla_a Q_{\theta_1}(s, a)|_{a=\pi_\phi(s)} \nabla_\phi \pi_\phi(s);$$

            Update target networks:

$$\theta_j^i \leftarrow \theta_j^{i+1}, \theta_j^m \leftarrow \tau \theta_j + (1 - \tau) \theta_j^m \quad (i = 1, \dots, m - 1; j = 1, 2);$$

$$\phi' \leftarrow \tau \phi + (1 - \tau) \phi';$$

$c_{k+1} = c_k + 1$ ;

**if**  $k \bmod T_r = 0$  **then**

$\Delta_{min} = \min(\Delta_{min}, \Delta_{T_r})$ ;

**if**  $\Delta_{T_r} > \Delta_{min}$  **then**

$\Delta_{min} = \inf$ , and  $c_{k+1} = 1$ ;

## C Hyperparameters

Table 1: Hyperparameters used in Dueling-DQN and RAA-Dueling-DQN.

| Hyperparameters                     | Value                                |
|-------------------------------------|--------------------------------------|
| <i>Network</i>                      |                                      |
| channels                            | 32, 64, 64                           |
| filter size                         | $8 \times 8, 4 \times 4, 3 \times 3$ |
| stride                              | 4, 2, 1                              |
| Val: (hidden units, output units)   | (512, 1)                             |
| Adv: (hidden units, output units)   | (512, action dimensions)             |
| <i>Shared</i>                       |                                      |
| optimizer                           | RMSprop                              |
| start time steps                    | $5 \times 10^4$                      |
| discount factor                     | 0.99                                 |
| replay buffer size                  | $10^6$                               |
| batch size                          | 32                                   |
| frames stacked                      | 4                                    |
| action repetitions                  | 4                                    |
| learning rate                       | 0.00025                              |
| <i>RAA-Dueling-DQN</i>              |                                      |
| progressive coefficient ( $\beta$ ) | 0.05                                 |
| sample size for RAA ( $N_A$ )       | 128                                  |
| regularization scale                | 0.1                                  |
| number of previous estimates        | 5                                    |
| target update interval              | 2000                                 |
| <i>Dueling-DQN</i>                  |                                      |
| target update interval              | 10000                                |

Table 2: Hyperparameters used in TD3 and RAA-TD3.

| Hyperparameters                     | Value                 |
|-------------------------------------|-----------------------|
| <i>Network</i>                      |                       |
| Critic: hidden units                | 400, 300              |
| output units                        | 1                     |
| Actor: hidden units                 | 400, 300              |
| output units                        | action dimensions     |
| <i>Shared</i>                       |                       |
| optimizer                           | Adam                  |
| start time steps                    | $10^4$                |
| discount factor                     | 0.99                  |
| replay buffer size                  | $10^6$                |
| batch size                          | 100                   |
| exploration noise                   | 0.1                   |
| target update rate ( $\tau$ )       | $5 \times 10^{-3}$    |
| actor update frequency              | 2                     |
| exploration policy                  | $\mathcal{N}(0, 0.2)$ |
| <i>RAA-TD3</i>                      |                       |
| progressive coefficient ( $\beta$ ) | 0.1                   |
| sample size for RAA ( $N_A$ )       | 400                   |
| regularization scale                | 0.001                 |
| number of previous estimates        | 5                     |
| <i>TD3</i>                          |                       |

## D Additional Learning Curves

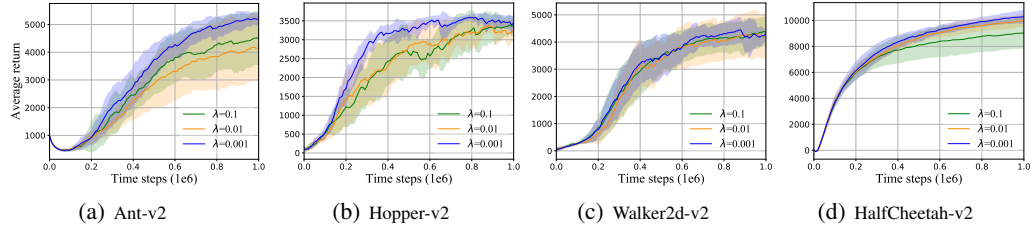

Figure 6: Sensitivity of RAA-TD3 to the scaling of regularization on continuous control tasks.

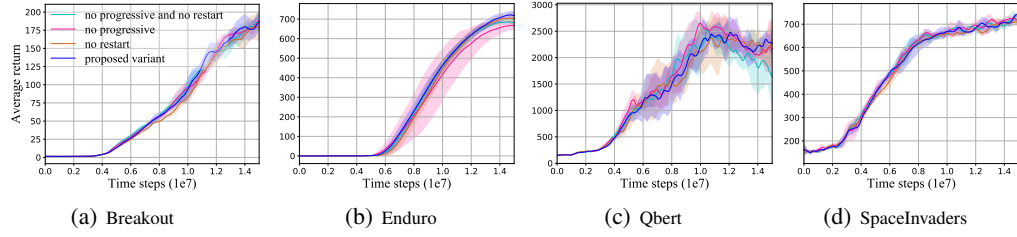

Figure 7: Ablation analysis of RAA-Dueling-DQN (blue) over progressive update and adaptive restart.
